# Supplementary material for: Deficiency in DNAH12 causes male infertility by impairing DNAH1 and DNALI1 recruitment in humans and mice
Source: eLife journal article supplement (doi:10.7554/elife.100350), 2024-08-27

Figure 7

Figure 7A

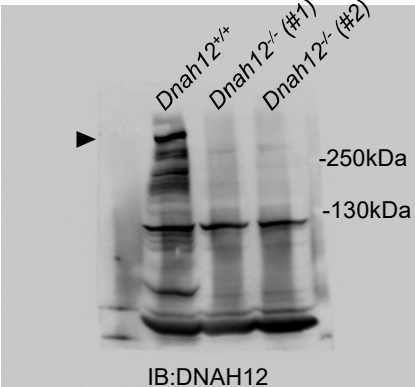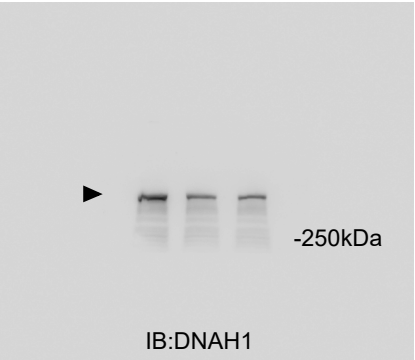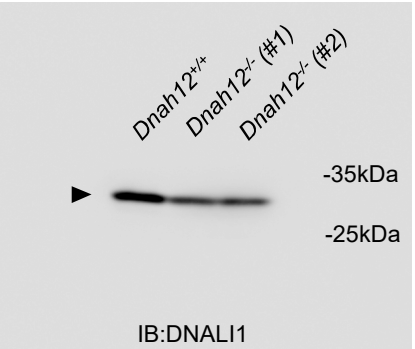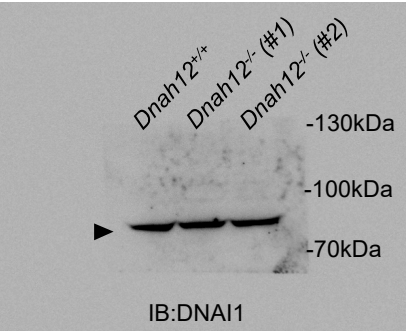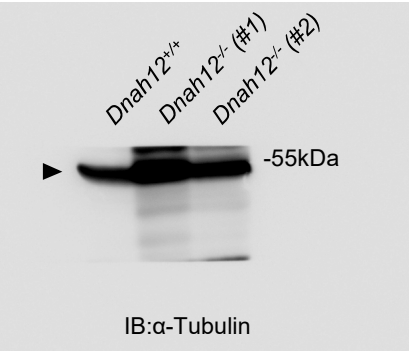

Repeats:

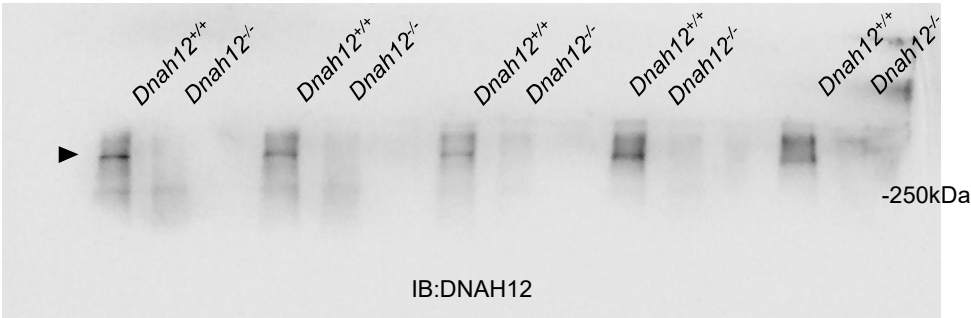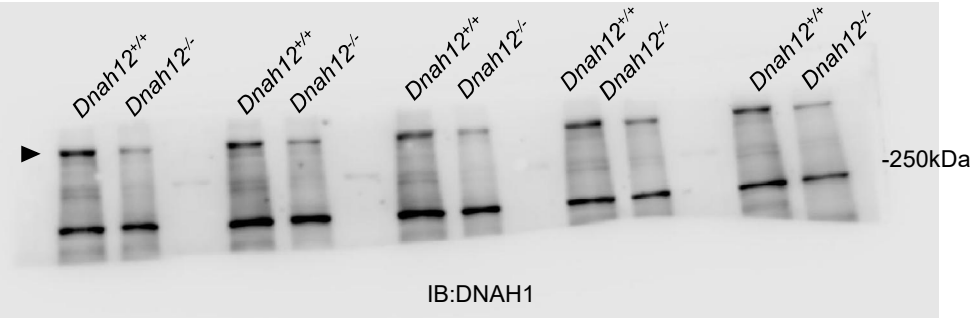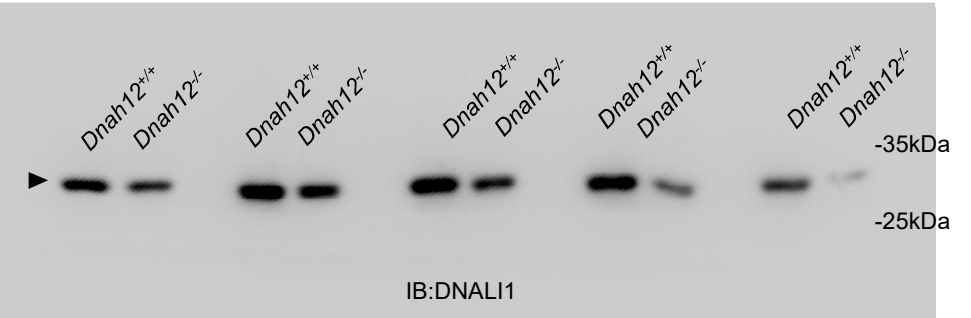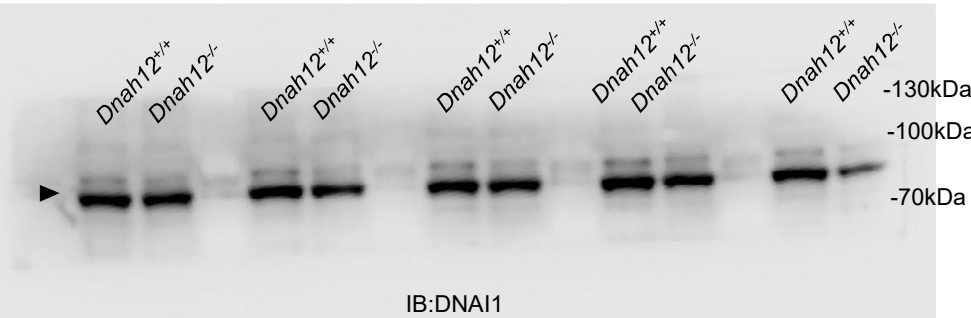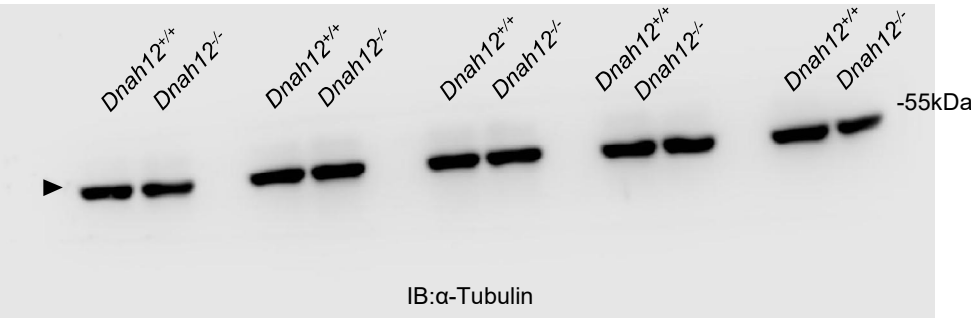

Figure 7

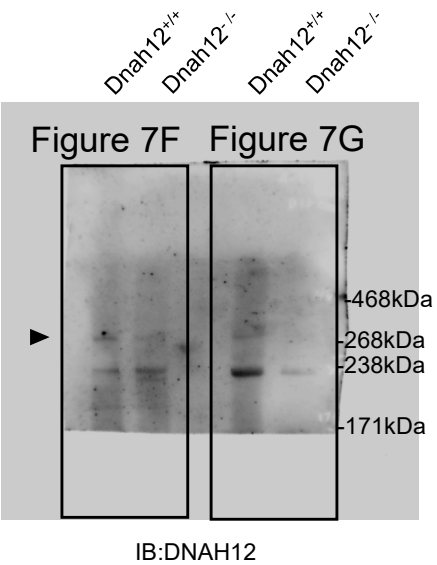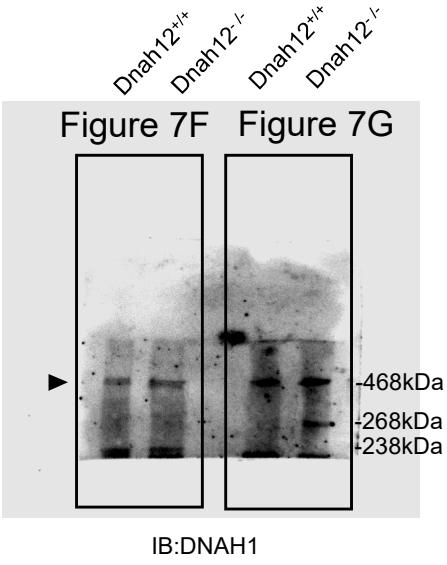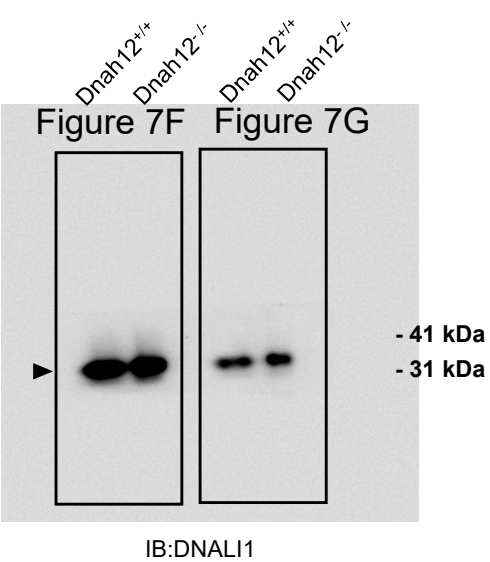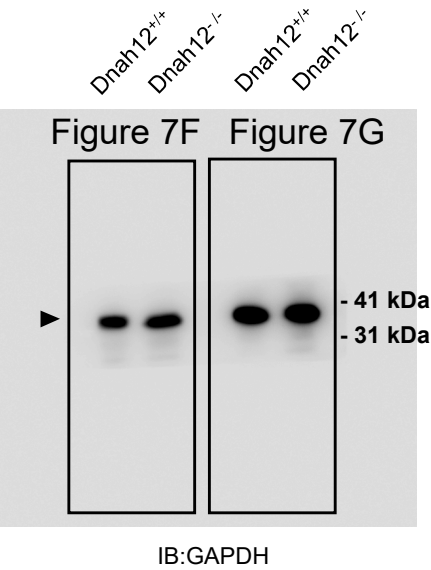

Figure 7

Repeats of Figure 7F

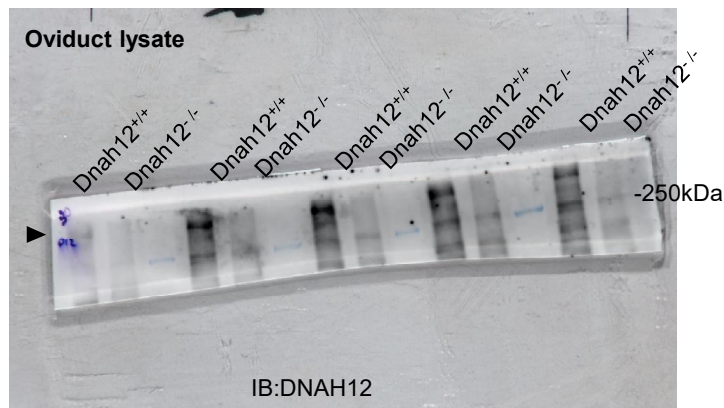

Repeats of Figure 7F

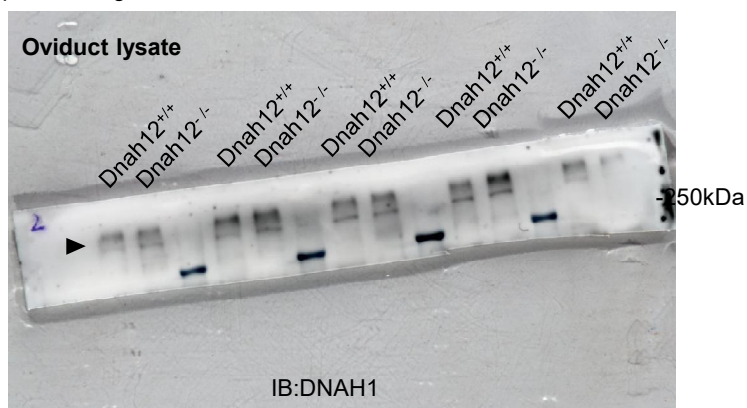

Repeats of Figure 7F

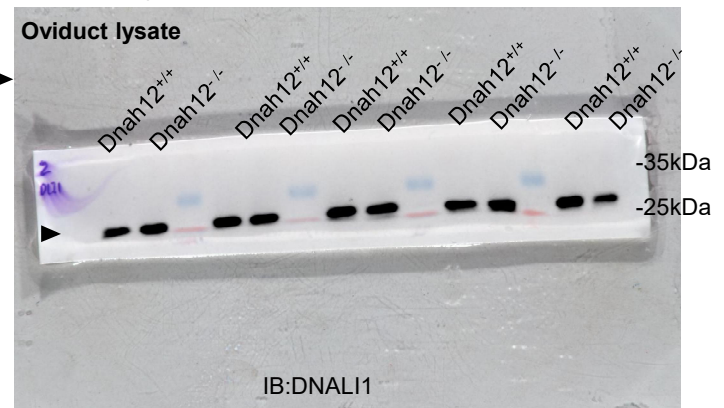

Repeats of Figure 7F

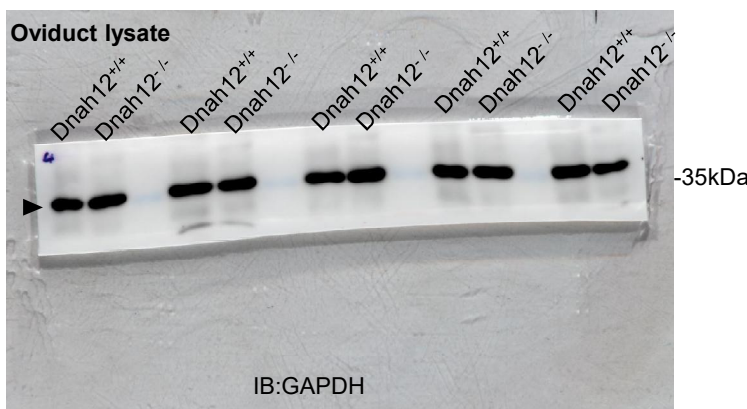

Repeats of Figure 7G

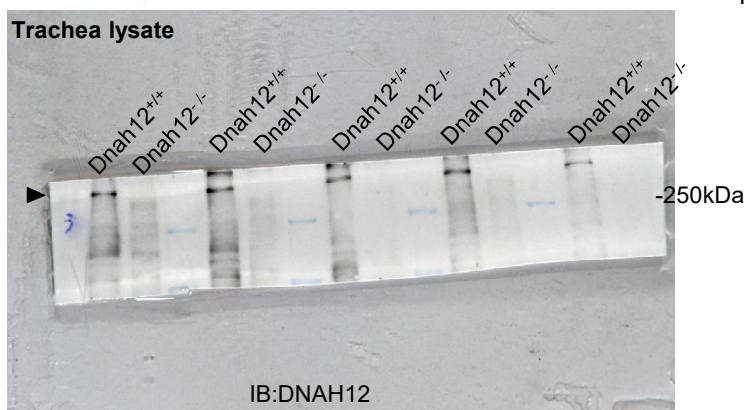

Repeats of Figure 7G

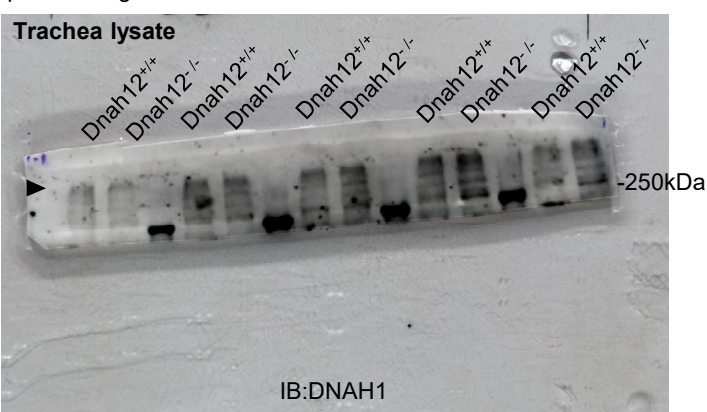

Repeats of Figure 7G

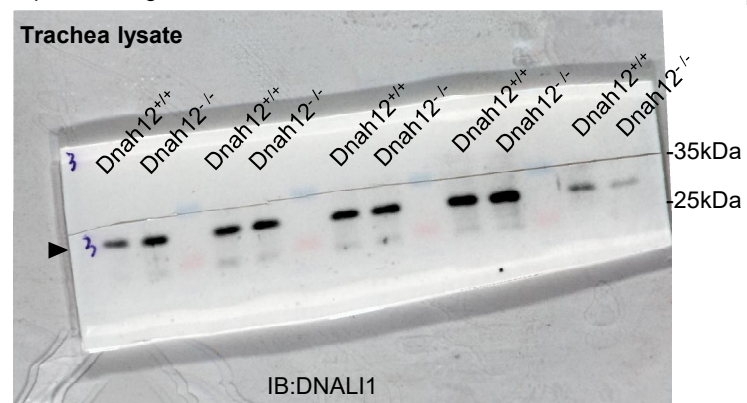

Repeats of Figure 7G

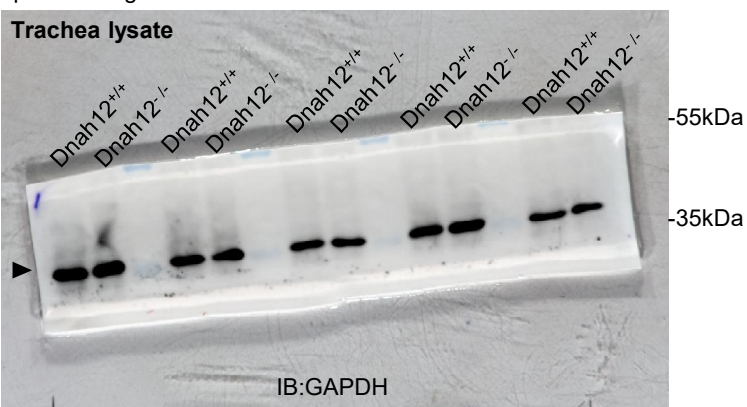

Supplement: fig7-data1 [file elife-100350-fig7-data1-v1.zip]
