# Supplementary material for: Deficiency in DNAH12 causes male infertility by impairing DNAH1 and DNALI1 recruitment in humans and mice
Source: eLife journal article supplement (doi:10.7554/elife.100350), 2024-08-27
Supplement: fig4-figsupp1-data1 [file elife-100350-fig4-figsupp1-data1-v1.zip]

Figure 4-figure supplement 1

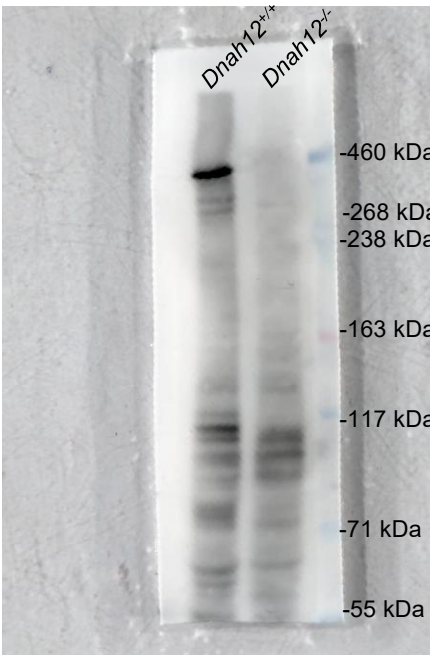

IB: DNAH12-Rabbit antibody

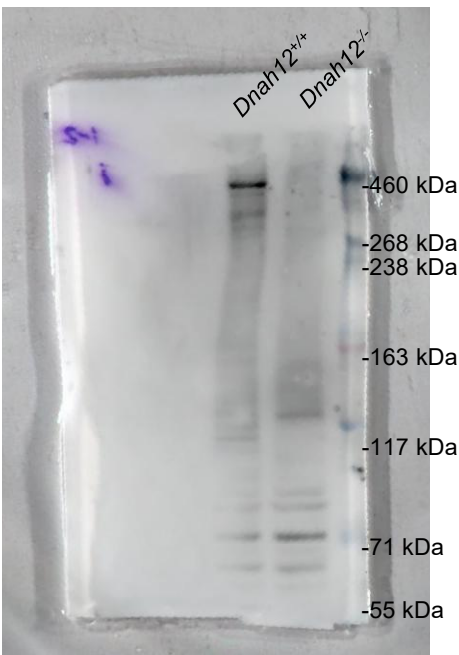

IB: DNAH12-Rat antibody

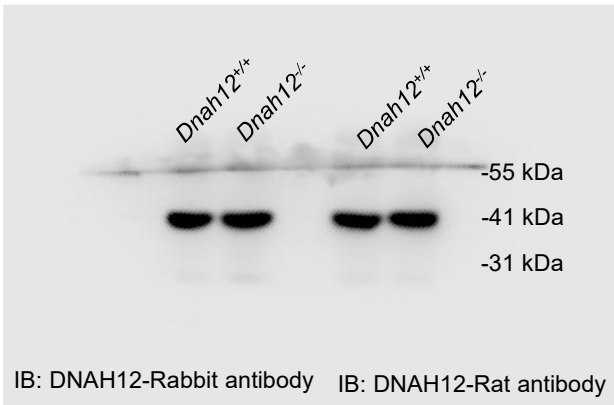

IB: DNAH12-Rabbit antibody    IB: DNAH12-Rat antibody
